# Supplementary material
Source: MDPI journal article supplement (https://www.mdpi.com/2073-4352/13/1/100)
Supplement: s1 [file s1]

Archive with 2 entries (2 files):
- Checkcif_CuX-Quinoxaline.pdf
- crystals-2130166-supplementary.pdf
